# Supplementary material for: Mesenchymal stem cells in the treatment of traumatic articular cartilage defects: a comprehensive review
Source: Springer Nature journal article supplement (doi:10.1186/s13075-014-0432-1), 2014-09-25
Supplement: MOESM1 [file 9783290]

## **MEDLINE search strategy**

Ovid MEDLINE(R) In-Process & Other Non-Indexed Citations, Ovid MEDLINE(R) Daily and Ovid MEDLINE(R) 1946 to Present

### ***Search steps***

Limits: English, 1994-current

1. (cartilag\* or chondrogen\*).ti,ab.
2. cartilage/ or cartilage, articular/
3. Chondrogenesis/
4. osteochondr\*.ti.
5. or/1-4
6. exp Mesenchymal Stem Cell Transplantation/ or exp Mesenchymal Stromal Cells/
7. Stromal Cells/
8. ((mesenchymal adj3 cell\*) or (bone marrow adj2 cell\*) or (bone marrow and stromal cell\*)).ti,ab.
9. or/6-8;
10. 5 and 9
11. 10 not osteoarthritis.ti.
12. limit 11 to (english language and yr="1994-Current")
13. In Vitro/
14. (monolayer\* or cell aggregat\* or pellet\* or micromass\* or transwell\* or hydrogel\* or "ex vivo" or explant\*).ti,ab.
15. in vitro.ti.
16. or/13-15
17. 12 and 16
18. in vivo.ti,ab.
19. 17 and 18
20. 12 not 17
21. humans/ not (animals/ and humans/)
22. 20 not 21
23. 19 or 22
24. 12 not (17 or 22)

### ***Output***

*In vitro* articles: search step 17

*In vivo* animal articles: search step 23

Clinical articles: search step 24

## **EMBASE search strategy**

Embase 1974 to 2014 July 02

### ***Search steps***

Limits: English, 1994-current, articles not within MEDLINE (previous search)

1. (cartilag\* or chondrogen\*).ti,ab.
2. cartilage/ or cartilage, articular/
3. Chondrogenesis/
4. osteochondr\*.ti.
5. or/1-4
6. exp Mesenchymal Stem Cell Transplantation/ or exp Mesenchymal Stromal Cells/
7. Stromal Cells/
8. ((mesenchymal adj3 cell\*) or (bone marrow adj2 cell\*) or (bone marrow and stromal cell\*)).ti,ab.
9. or/6-8
10. 5 and 9
11. 10 not osteoarthritis.ti.
12. limit 11 to (english language and yr="1994-Current")
13. in vitro study/ or exp vivo study/
14. (monolayer\* or cell aggregat\* or pellet\* or micromass\* or transwell\* or hydrogel\* or "ex vivo" or explant\*).ti,ab.
15. in vitro.ti.
16. or/13-15
17. 12 and 16
18. in vivo.ti,ab.
19. 17 and 18
20. 12 not 17
21. humans/ not (animals/ and humans/)
22. 20 not 21
23. 19 or 22
24. 12 not (17 or 22)
25. in vivo study/
26. 12 and 25
27. 23 or 26
28. limit 17 to exclude medline journals
29. limit 27 to exclude medline journals
30. limit 24 to exclude medline journals

### ***Output***

*In vitro* articles: search step 28

*In vivo* animal articles: search step 29

Clinical articles: search step 30

## **Web of Science search strategy**

Version 5.13.3

### ***Search steps***

Limits: 1994-2014, English, Article

1. TOPIC: ((mesenchymal NEAR/3 cell\*) OR ("bone marrow" NEAR/2 cell\*)) AND (cartilage OR chondrogen\*)
2. TITLE: (meniscus OR osteoarthritis)
3. #1 NOT #2
4. TOPIC: ("in vitro" OR monolayer\* OR cell aggregat\* OR pellet\* OR micromass\* OR transwell\* OR hydrogel\* OR "ex vivo" OR explant\*)
5. #3 AND #4
6. TOPIC: (transplant\* OR defect\* OR lesion\*) OR "in vivo"
7. TOPIC: (animal OR rat OR rabbit OR dog OR sheep OR horse OR pig OR goat OR murine OR leporine OR canine OR ovine OR equine OR porcine OR caprine)
8. #6 AND #7
9. (#3 AND #8) NOT #5
10. TOPIC: (human OR epidemiologic\* OR observational OR "follow up" OR cohort OR retrospective OR "case series" OR "case report" OR "case study" OR "transplant\*" OR "defect" OR "lesion")
11. (#3 AND #10) NOT (#5 OR #9)

### ***Output***

*In vitro* articles: search step 5

*In vivo* animal articles: search step 9

Clinical articles: search step 11
